# Supplementary material for: Beneficial effects of ginkgetin on improving nonalcoholic steatohepatitis characterized by bulk and single-cell RNA sequencing analysis
Source: Front Pharmacol. 2023 Oct 4;14:1267445. doi: 10.3389/fphar.2023.1267445 (PMC10582714; doi:10.3389/fphar.2023.1267445)
Supplement: Supplementary file 1 [file Table2.XLSX]

## Sheet: GSEA
id	name	SIZE	ES	NES	NOM p-val	FDR q-val	Genes
GO_LIPID_OXIDATION	http://www.broadinstitute.org/gsea/msigdb/cards/GO_LIPID_OXIDATION	62	-0.610889	-2.51151	0	0	GCDH;IVD;PEX7;AMACR;CRAT;CYGB;ACADM;ECI1;SCP2;ACOX3;ECI2;ECHS1;HADH;ACADSB;ACADS;PEX13;MAPK14;ECH1;SLC27A2;ADIPOR1;HADHA;ACADL;CROT;PPARG;BDH2;ETFDH;PPARD;PPARGC1A;ACADVL;ACAD8;ALOX12;ABCD1;SESN2;ACAD11;ACOX1;PHYH;ACOX2;PLA2G7;ADIPOR2;ACAD10;DECR1;HAO1;NUDT19;PRKAA1;SLC25A17;HACL1;ETFB;HADHB;ADH7;ETFA;ACOT8;ACSM1;POR;ALDH3A2;HSD17B4;ABCD2;ACAD9;PEX2;ABCD3;EHHADH;CPT2;CPT1A
GO_STEROID_METABOLIC_PROCESS	http://www.broadinstitute.org/gsea/msigdb/cards/GO_STEROID_METABOLIC_PROCESS	155	-0.474405	-2.27041	0	0.000122	CYP2R1;NPC2;ACOT8;MVD;ANGPTL3;MVK;PCSK9;MBTPS2;ATP8B1;PMVK;ABCA1;CAT;BAAT;NSDHL;HSD17B11;HSD17B2;CYB5R1;APOA2;CYP46A1;SULT1A1;SQLE;CYP39A1;YWHAH;LSS;APOA5;SRD5A3;ARV1;CEBPA;PRKAA1;EBPL;CYP2E1;WNT4;TIPARP;WWOX;HINT2;CNBP;APOA1;CYP1A2;HSD3B7;CYP7A1;FDX1L;HMGCS2;APP;HMGCS1;SULT1B1;APOF;CLN8;TSPO;FDXR;HSD17B7;SDR42E1;SRD5A1;PPARD;ABCB11;LBR;ACBD3;PON1;LEPR;LCAT;NPC1;PRKAG2;GGPS1;PRLR;CYP27A1;SCAP;SRD…
GO_FATTY_ACID_METABOLIC_PROCESS	http://www.broadinstitute.org/gsea/msigdb/cards/GO_FATTY_ACID_METABOLIC_PROCESS	201	-0.395102	-1.99635	0	0.00546741	FASN;PAM;ECH1;ACSL3;PRKAG1;PTGES2;LTA4H;ACACA;GGT6;XBP1;ACOT7;DAGLA;ACADM;CYGB;C3;ACOX3;ACSF2;PTGR2;RPP14;ACSM1;ANGPTL3;PEX2;MCEE;EPHX2;AASDH;ABCC1;ABCD3;ALKBH7;GHR;TNXB;ACOT1;DLD;AACS;BAAT;ACSL1;CPT1A;ALDH5A1;PLA2G15;ABCD1;ACOX1;ACAD11;LTC4S;NUDT19;HAO1;ACOT12;DECR1;ACAD10;ELOVL3;ELOVL2;OXSM;PNPLA8;ACLY;THEM4;MAPKAPK2;ADIPOR1;PPARG;ACSM5;DEGS1;STAT5A;MGLL;DAGLB;PLP1;BDH2;TBXAS1;PECR;MUT;PEX7;GCD…
GO_LIPID_MODIFICATION	http://www.broadinstitute.org/gsea/msigdb/cards/GO_LIPID_MODIFICATION	165	-0.332576	-1.65032	0	0.0610641	IMPA2;PPAPDC1B;ETFDH;PPARD;ACADVL;PPAP2C;PIK3CD;SLC35C1;PDGFA;BTC;PDGFRB;GAB1;MTMR1;MAPK14;ECH1;SMG1;ERBB2;MTMR6;ACOX3;ACADSB;ECHS1;HADH;CYGB;ACADM;PI4KB;B4GALNT1;PPAP2A;LCAT;PDGFB;PIP4K2C;CD28;TMEM55A;CPT1A;PPAP2B;ABCD3;TMEM150A;PIP4K2B;IMPAD1;CPT2;FYN;HBEGF;PI4K2A;EPHX2;FGFR2;PEX2;CD80;INPP5A;ACSM1;ACOT8;INPP5D;LPPR2;HACL1;INPP5B;CD19;FRS2;ADH7;DECR1;ACAD10;FAM126A;EFR3B;PRKAA1;SPHK2;HAO1;NUDT1…
GO_LIPID_CATABOLIC_PROCESS	http://www.broadinstitute.org/gsea/msigdb/cards/GO_LIPID_CATABOLIC_PROCESS	171	-0.330707	-1.61256	0	0.072346	BDH2;PPT1;APOE;DAGLB;ACAD8;MGLL;SLC27A4;PLCG2;GBA;SLC27A2;HADHA;PLD2;LPIN2;CROT;GALC;ACADL;PNPLA8;SMPD3;PLBD1;PLCE1;PLD3;PLA2G6;PLBD2;ECI2;SMPD1;ECI1;SCP2;ACADS;PEX13;PLCXD2;SMPD4;PLCB3;PNPLA2;PNPLA6;APOA4;AMACR;LIPA;PLA2G12A;PAFAH1B2;SIRT2;INPP5F;CRAT;PLCB4;IVD;GCDH;PEX7;MUT;PLD6;PLCB2;PLCB1;SGPL1;HSD17B6;PCCB;SCARF1;NEU3;LPL;EHHADH;AKR1D1;ABCD2;FAAH;LIPE;BCO2;CPS1;ACAD9;ETFA;HSD17B4;ALDH3A2;BSC…
GO_FATTY_ACID_TRANSPORT	http://www.broadinstitute.org/gsea/msigdb/cards/GO_FATTY_ACID_TRANSPORT	38	-0.415974	-1.59534	0.00913242	0.0806083	ABCD1;ABCC2;ACACA;ACE;FABP1;ANXA1;SLC25A20;ACACB;ACSL4;PRKAG2;PPARA;SLC25A17;PRKAA2;SLC27A5;PLA2G4A;SLC27A1;SLC27A2;ABCD2;ACSL3;GOT2;CROT;PLIN2;PNPLA8;ABCD3;SLCO2A1;PRKAB2;MFSD2A;SLC27A4;KISS1R;PPARG;ABCC4;CPT2;CPT1A;ACSL1;PPARD;APOE;SLCO3A1;CD36
GO_PROTEIN_LIPID_COMPLEX_ASSEMBLY	http://www.broadinstitute.org/gsea/msigdb/cards/GO_PROTEIN_LIPID_COMPLEX_ASSEMBLY	20	-0.500118	-1.58716	0.0263158	0.0840244	APOA4;ARF1;APOA5;ABCA1;ABCA7;APOE;BIN1;MTTP;SOAT2;APOA1;SNX9;APOC3;APOC1;APOM;APOB;APOA2;PLAGL2;DGAT1;SOAT1;ACSL3
GO_LIPID_BIOSYNTHETIC_PROCESS	http://www.broadinstitute.org/gsea/msigdb/cards/GO_LIPID_BIOSYNTHETIC_PROCESS	392	-0.286735	-1.47292	0	0.135264	ST3GAL1;GRB2;CYP46A1;HSD17B2;ST6GALNAC4;ELOVL2;GPD1L;MPPE1;ELOVL3;WNT4;GBGT1;PI4K2A;TAMM41;ISYNA1;PHOSPHO1;BAAT;DEGS2;ABCD3;SLC44A2;ST3GAL2;TAZ;PI4KB;ACOT7;ACACA;PIP4K2C;MTMR6;CYP8B1;PCYT2;ACSL3;HMGCS2;CYP7A1;HSD3B7;FASN;GPAA1;SGPP1;SRD5A1;SLC44A3;ST3GAL4;SDR42E1;PPAP2C;EPT1;LTA4H;TSPO;ACAA2;RDH10;EBP;ACOX2;LPCAT2;MTMR4;DDHD2;CYP17A1;PGAP2;DPM2;PIGM;ALDH1A3;CYP7B1;INSIG1;KLB;PGAP3;FITM2;PIGA;INPP…
GO_POSITIVE_REGULATION_OF_TUMOR_NECROSIS_FACTOR_SUPERFAMILY_CYTOKINE_PRODUCTION	http://www.broadinstitute.org/gsea/msigdb/cards/GO_POSITIVE_REGULATION_OF_TUMOR_NECROSIS_FACTOR_SUPERFAMILY_CYTOKINE_PRODUCTION	49	-0.708608	-2.3151	0	0	ADAM8;NCL;ARHGEF2;RASGRP1;MAPKAPK2;PTAFR;CCL2;MAVS;CLU;HMGB1;PIK3R1;CARD9;TLR3;FADD;CYBA;TLR2;CD36;PF4;TLR1;ARFGEF2;HDAC2;SPON2;JAK2;RIPK1;TLR9;SASH3;NOD1;CD86;TICAM1;CD2;CCR2;CD14;RIPK2;HAVCR2;NFATC4;HSPB1;TWIST1;FCER1G;LGALS9;THBS1;LY96;CCL19;ZBTB20;PYCARD;NOD2;LBP;TIRAP;SPN;TLR4
GO_INFLAMMATORY_RESPONSE	http://www.broadinstitute.org/gsea/msigdb/cards/GO_INFLAMMATORY_RESPONSE	268	-0.512736	-2.01013	0	0.000598	CCL5;KLKB1;HNRNPA0;RAC1;TNFRSF21;C4A;F12;NLRP3;TNFRSF11B;RIPK2;IL20RB;CNR2;LGALS9;FCER1G;NGFR;C3;CCL25;CHST2;NFRKB;HDAC4;CD40;PRKCZ;STAT3;HFE;TSPAN2;ACVR1;SLC7A2;NOTCH1;AHCY;NTRK2;PRKCQ;S100A8;TLR7;ADORA2A;CX3CL1;LTA4H;NFKB1;AOX1;CDO1;CCRL2;F3;NFKBIZ;KDM6B;LYN;CD163;APOA2;IL15;NMI;SMAD1;CD14;C3AR1;HIF1A;CXCL1;XCR1;GJA1;BLNK;C4B;SPP1;NFKBID;LAT;ITGAL;CLEC7A;CCR5;APOC3;HYAL1;MEFV;RASGRP1;SIGIRR;EPH…
GO_CYTOKINE_PRODUCTION	http://www.broadinstitute.org/gsea/msigdb/cards/GO_CYTOKINE_PRODUCTION	79	-0.57038	-2.00621	0	0.000647	NFATC2IP;BCL10;HEG1;TRIM56;ITK;TRIM27;PIK3CD;DENND1B;NFATC2;PNP;NOTCH1;RBPJ;PTAFR;PAWR;TUSC2;S100A8;PCSK5;GBP5;SLC11A1;CCR7;IRF7;NFAT5;LTBP3;GPAM;S100A13;GAS6;NR1H4;TMEM173;NLRP3;PRKCD;LIPA;FOXP1;S1PR3;CD36;IFNAR1;MAF;SIRT1;CD28;TLR2;AIM2;MR1;IL1B;PLA2R1;HSPD1;TLR6;CD4;TBK1;CEBPE;HMGB1;ABCA1;IRF3;IL12RB2;SEH1L;IL18;CAMK4;RASGRP1;FABP4;CASP1;TLR4;NOD2;IRAK4;DLG1;S100A9;RFTN1;CD55;CXCR3;CCL19;AGT;A…
GO_RESPONSE_TO_INTERFERON_GAMMA	http://www.broadinstitute.org/gsea/msigdb/cards/GO_RESPONSE_TO_INTERFERON_GAMMA	78	-0.569671	-1.97846	0	0.000899	IRF4;IRF8;IFITM3;DAPK1;SYNCRIP;TRIM68;EDN1;CXCL16;OAS3;GBP6;TRIM8;IFITM1;KYNU;NUB1;IRF9;CD86;CCL24;VCAM1;CAMK2G;IRF3;MID1;AIF1;DAPK3;CAMK2D;IFNGR2;IL12RB1;SP100;DNAJA3;SNCA;GCH1;EPRS;JAK2;JAK1;PRKCD;TRIM21;SLC11A1;GBP5;SLC26A6;ADAMTS13;PTAFR;CAMK2B;HCK;CCL19;CIITA;SEC61A1;B2M;IRF6;PML;TRIM26;CD44;OAS2;MRC1;TLR3;CCL2;AQP4;BST2;GBP2;UBD;MEFV;LGALS9;IRF1;CCL25;STAR;STAT1;IRF5;IRF7;IFI30;TRIM62;CCL5;…
GO_RESPONSE_TO_INTERFERON_ALPHA	http://www.broadinstitute.org/gsea/msigdb/cards/GO_RESPONSE_TO_INTERFERON_ALPHA	17	-0.676839	-1.78048	0.0028777	0.0100104	IFNAR1;STAR;GAS6;MX2;KLHL20;TPR;IFITM3;IFNAR2;AXL;EIF2AK2;ENTPD2;ADAR;BST2;IFIT3;IFITM2;IFIT2;IFITM1
GO_INTRINSIC_APOPTOTIC_SIGNALING_PATHWAY_BY_P53_CLASS_MEDIATOR	http://www.broadinstitute.org/gsea/msigdb/cards/GO_INTRINSIC_APOPTOTIC_SIGNALING_PATHWAY_BY_P53_CLASS_MEDIATOR	42	-0.47405	-1.4709	0.0239362	0.0890186	SHISA5;DDX5;MYBBP1A;SIRT1;NUPR1;PPP2R5C;DDIT4;PPP1R13B;RPS27L;TOPORS;CDKN1A;E2F2;BAX;HIPK1;E2F1;EP300;PMAIP1;HINT1;DYRK2;BOK;RRP8;STK11;ZMAT1;BAG6;PDK2;PGAP2;BCL3;SNW1;MSH2;HIPK2;PYCARD;PML;WWOX;TMEM109;FHIT;PERP;ZMAT3;USP28;EDA2R;AEN;PHLDA3;BRCA2
GO_NEGATIVE_REGULATION_OF_NF_KAPPAB_TRANSCRIPTION_FACTOR_ACTIVITY	http://www.broadinstitute.org/gsea/msigdb/cards/GO_NEGATIVE_REGULATION_OF_NF_KAPPAB_TRANSCRIPTION_FACTOR_ACTIVITY	53	-0.494137	-1.64932	0.00637755	0.0298829	NLRC5;USP7;PARP10;MAP2K5;PTGIS;COMMD1;CAT;SIRT1;ERBB2IP;COMMD6;CYLD;AIM2;ITCH;ARRB2;PELI1;PRMT2;CYP1B1;PIAS4;DAP;TLR9;NFKBIL1;PKHD1;UFL1;SETD6;NLRP12;NFKBID;PYCARD;CMKLR1;KLF4;HAVCR2;TNFAIP3;NFKBIA;TAX1BP1;RBCK1;TRIM21;ANXA4;TRAF3;RWDD3;IRAK3;COMMD7;NLRP3;IRAK1;BMP7;ZC3H12A;SIVA1;BRMS1;DNAJA3;IRAK2;DAB2IP;CDK5RAP3;PSMD10;ARRB1;TRIM37
GO_REGULATION_OF_FIBROBLAST_PROLIFERATION	http://www.broadinstitute.org/gsea/msigdb/cards/GO_REGULATION_OF_FIBROBLAST_PROLIFERATION	63	-0.492581	-1.6491	0.0086741	0.0298223	B4GALT7;MIF;FBLN1;PRKDC;CD74;BMI1;PML;CDK4;AGT;FN1;TGFB1;EREG;SIRT6;MORC3;CDKN1A;PEX2;FTH1;MYC;CREB1;PMAIP1;NDUFS4;BAX;MED25;PARP10;FOSL2;S100A6;NF1;EMD;TRIM32;NUPR1;CDC73;WNT2;MED31;CTC1;AQP1;EGFR;CD300A;PDGFB;GSTP1;PDGFD;WAPAL;CTNNB1;PDGFC;FNTB;IFI30;GAS6;ESR1;DAB2IP;ANXA2;ZMIZ1;PDGFRA;SFRP1;DDR2;BTC;E2F1;SKI;CDK6;RNASEH2B;IGF1;WNT5A;PDGFA;PPARG;LIG4
GO_PLATELET_DERIVED_GROWTH_FACTOR_RECEPTOR_SIGNALING_PATHWAY	http://www.broadinstitute.org/gsea/msigdb/cards/GO_PLATELET_DERIVED_GROWTH_FACTOR_RECEPTOR_SIGNALING_PATHWAY	33	-0.532303	-1.6113	0.00828729	0.0395208	BCAR1;VEGFA;PDGFB;JAK2;PLEKHA1;RGS14;PTPRJ;ZFAND5;BCR;FER;CLASP2;SRC;PDGFRA;TIPARP;PDGFD;ARID5B;IQGAP1;PDGFC;CSRNP1;TXNIP;PTPN11;RAPGEF1;NRP1;GAB1;PDGFRB;PIK3C2A;PTEN;PDGFA;PTPN1;PLAT;MYO1E;SGPL1;ABL1
GO_EXTRACELLULAR_STRUCTURE_ORGANIZATION	http://www.broadinstitute.org/gsea/msigdb/cards/GO_EXTRACELLULAR_STRUCTURE_ORGANIZATION	204	-0.667993	-2.56051	0	0	COL27A1;MYH11;ERCC2;COL4A2;FKBP1A;CTSS;CYR61;MPV17;ADAMTS14;LAMA1;PDGFA;ICAM1;LAMB1;COL4A3;PDGFB;SH3PXD2B;CAPN1;ADAM15;CCDC80;KAZALD1;FGA;NFKB2;MMP15;SERAC1;MPZL3;MFAP4;ATXN1L;NF1;CD36;COL11A2;CREB3L1;ELN;FLRT2;ITGA5;FBLN1;COL6A2;VTN;RIPK1;COL4A4;CD44;LAMC1;COL1A2;SERPINH1;MMP9;LAMC2;CAPNS1;ITGA1;ABI3BP;EXOC8;ITGB7;KIF9;VWA1;DDR2;PLOD3;ADAM8;DAG1;ATP7A;ERO1L;ITGA2B;ITGAM;AGRN;LAMB2;ITGAV;ITGB5;SO…
GO_RESPONSE_TO_TRANSFORMING_GROWTH_FACTOR_BETA	http://www.broadinstitute.org/gsea/msigdb/cards/GO_RESPONSE_TO_TRANSFORMING_GROWTH_FACTOR_BETA	122	-0.481489	-1.76607	0	0.0116189	ACVR1;SMAD2;RHOA;FKBP1A;COL4A2;EID2;PDGFA;FURIN;ID1;UBC;STK16;RPS27A;WNT5A;LEFTY1;TGFBR3;UBA52;CCL5;IL1R1;ACVRL1;PDGFB;PTPRK;MAP3K7;SOX6;FERMT2;SKIL;TGFB2;SFRP1;STAR;ZFYVE9;SMAD4;PPM1A;PRKCZ;HIPK2;PARD3;NEDD8;NOX4;BMPR1A;COL3A1;CREB1;CAV1;FYN;CCL2;ARRB2;UBE2M;CX3CR1;APAF1;TGFB3;COL1A2;PARP1;SMAD1;PDE2A;CBL;ARHGEF18;SMAD5;FMOD;ZFHX3;YES1;WNT4;APOA1;RAPGEF3;WWOX;PML;USP15;PARD6A;HYAL2;PDCD5;LIMS1;G…
